# Supplementary material
Source: PubMed Central journal article supplement (PMC3732738)
Supplement: NIHMS484804-supplement-supplement_1.pdf [file NIHMS484804-supplement-supplement_1.pdf]

Supplemental Table 1. Forward and reverse primers of genes analyzed using standard real-time PCR.

| Symbol          | Gene Name              | Marker of                         | Forward Sequence (5' to 3') | Reverse Sequence (5' to 3') | Genebank Accession Number |
|-----------------|------------------------|-----------------------------------|-----------------------------|-----------------------------|---------------------------|
| <b>OCT4</b>     | POU5F1                 | Pluripotency                      | CCGTGTGAGGTGGAGTCTGGAG      | GCGATGTGAGTGATCTGCTGTAGG    | NM_013633                 |
| <b>NES</b>      | Nestin                 | Ectoderm                          | GGAGAAGCAGGGTCTACAG         | AGCCACTTCCAGACTAAGG         | NM_016701                 |
| <b>T-BRACHY</b> | T, Brachyury           | Mesoderm                          | CACACCACTGACGCACAC          | GAGGCTATGAGGAGGCTTTG        | NM_009309                 |
| <b>AFP</b>      | Alpha-fetoprotein      | Endoderm                          | CACACCCGCTTCCCTCATCC        | TTCTTCTCCGTCACGCACTGG       | NM_007423                 |
| <b>ACTA1</b>    | Alpha-actin 1          | Skeletal actin microfilament      | CACCCAGGGCCAGAGTCA          | TCTCGTCTTCGTCGCACATG        | NM_009606                 |
| <b>ACTA2</b>    | Alpha-actin 2          | Smooth muscle actin microfilament | TCCCTGGAGAAGAGCTACGAACT     | AAGCGTTTCGTTTCCAATGGT       | NM_007392                 |
| <b>KRT8</b>     | Keratin 8              | Intermediate filament             | TGGTGTCGGAGTCTTCTGATGT      | CAGGCTGGCAAGGACTTCA         | NM_031170                 |
| <b>VIM</b>      | Vimentin               | Intermediate filament             | GAGAGAGGAAGCCGAAAGCA        | GCCAGAGAAGCATTGTCAACATC     | NM_011701                 |
| <b>LMNA</b>     | Lamin A/C              | Intermediate filament             | CGCAGCATGCTCGCACTA          | ACGAACTTTCCTCTTCATCGA       | NM_001002011              |
| <b>TUBA1B</b>   | Tubulin alpha-1B chain | Microtubule                       | CGCCTTCTAACCCGTTGCT         | TGGCCAACGTGGATGGA           | NM_011654                 |

Supplemental Table 2. Genes analyzed using the Mouse Embryonic Stem Cell RT2 Profiler™ PCR Array.

| Symbol                                            | Description                                                                            | GenBank Accession Number |
|---------------------------------------------------|----------------------------------------------------------------------------------------|--------------------------|
| Afp                                               | Alpha fetoprotein                                                                      | NM_007423                |
| Bxdc2                                             | Brix domain containing 2                                                               | NM_026396                |
| Cd34                                              | CD34 antigen                                                                           | NM_133654                |
| Cd9                                               | CD9 antigen                                                                            | NM_007657                |
| Cdh5                                              | Cadherin 5                                                                             | NM_009868                |
| Cdx2                                              | Caudal type homeo box 2                                                                | NM_007673                |
| Col1a1                                            | Collagen, type I, alpha 1                                                              | NM_007742                |
| Comm3                                             | COMM domain containing 3                                                               | NM_147778                |
| Crabp2                                            | Cellular retinoic acid binding protein II                                              | NM_007759                |
| Ddx4                                              | DEAD (Asp-Glu-Ala-Asp) box polypeptide 4                                               | NM_010029                |
| Des                                               | Desmin                                                                                 | NM_010043                |
| Diap2                                             | Diaphanous homolog 2 (Drosophila)                                                      | NM_017398                |
| Dnmt3b                                            | DNA methyltransferase 3B                                                               | NM_010068                |
| EdnrB                                             | Endothelin receptor type B                                                             | NM_007904                |
| Eomes                                             | Eomesodermin homolog (Xenopus laevis)                                                  | NM_010136                |
| Fgf4                                              | Fibroblast growth factor 4                                                             | NM_010202                |
| Fgf5                                              | Fibroblast growth factor 5                                                             | NM_010203                |
| Fli1                                              | FMS-like tyrosine kinase 1                                                             | NM_010228                |
| Fn1                                               | Fibronectin 1                                                                          | NM_010233                |
| Foxa2                                             | Forkhead box A2                                                                        | NM_010446                |
| Foxd3                                             | Forkhead box D3                                                                        | NM_010425                |
| Gabbr3                                            | Gamma-aminobutyric acid (GABA) A receptor, subunit beta 3                              | NM_008071                |
| Gal                                               | Galanin                                                                                | NM_010253                |
| Gata4                                             | GATA binding protein 4                                                                 | NM_008092                |
| Gata6                                             | GATA binding protein 6                                                                 | NM_010258                |
| Gbx2                                              | Gastrulation brain homeobox 2                                                          | NM_010262                |
| Gcg                                               | Glucagon                                                                               | NM_008100                |
| Gcm1                                              | Glial cells missing homolog 1 (Drosophila)                                             | NM_008103                |
| Gdf3                                              | Growth differentiation factor 3                                                        | NM_008108                |
| Grb7                                              | Growth factor receptor bound protein 7                                                 | NM_010346                |
| Hba-x                                             | Hemoglobin X, alpha-like embryonic chain in Hba complex                                | NM_010405                |
| Hbb-y                                             | Hemoglobin Y, beta-like embryonic chain                                                | NM_008221                |
| Hck                                               | Hemopoietic cell kinase                                                                | NM_010407                |
| Iapp                                              | Islet amyloid polypeptide                                                              | NM_010491                |
| Ifitm1                                            | Interferon induced transmembrane protein 1                                             | NM_026820                |
| Ifitm2                                            | Interferon induced transmembrane protein 2                                             | NM_030694                |
| Igf2bp2                                           | Insulin-like growth factor 2 mRNA binding protein 2                                    | NM_183029                |
| Il6st                                             | Interleukin 6 signal transducer                                                        | NM_010560                |
| Ins2                                              | Insulin II                                                                             | NM_008387                |
| Kit                                               | Kit oncogene                                                                           | NM_021099                |
| Krt1                                              | Keratin 1                                                                              | NM_008473                |
| Lama1                                             | Laminin, alpha 1                                                                       | NM_008480                |
| Lamb1-1                                           | Laminin B1 subunit 1                                                                   | NM_008482                |
| Lamc1                                             | Laminin, gamma 1                                                                       | NM_010683                |
| Lefty1                                            | Left right determination factor 1                                                      | NM_010094                |
| Lefty2                                            | Left-right determination factor 2                                                      | NM_177099                |
| Lifr                                              | Leukemia inhibitory factor receptor                                                    | NM_013584                |
| Lin28                                             | Lin-28 homolog (C. elegans)                                                            | NM_145833                |
| Myf5                                              | Myogenic factor 5                                                                      | NM_008656                |
| Myod1                                             | Myogenic differentiation 1                                                             | NM_010866                |
| Nanog                                             | Nanog homeobox                                                                         | NM_028016                |
| Nes                                               | Nestin                                                                                 | NM_016701                |
| Neurod1                                           | Neurogenic differentiation 1                                                           | NM_010894                |
| Nodal                                             | Nodal                                                                                  | NM_013611                |
| Nog                                               | Noggin                                                                                 | NM_008711                |
| Nr5a2                                             | Nuclear receptor subfamily 5, group A, member 2                                        | NM_030676                |
| Nr6a1                                             | Nuclear receptor subfamily 6, group A, member 1                                        | NM_010264                |
| Numb                                              | Numb gene homolog (Drosophila)                                                         | NM_010949                |
| Olig2                                             | Oligodendrocyte transcription factor 2                                                 | NM_016967                |
| Pax4                                              | Paired box gene 4                                                                      | NM_011038                |
| Pax6                                              | Paired box gene 6                                                                      | NM_013627                |
| Pdx1                                              | Pancreatic and duodenal homeobox 1                                                     | NM_008814                |
| Pecam1                                            | Platelet/endothelial cell adhesion molecule 1                                          | NM_008816                |
| Podxl                                             | Podocalyxin-like                                                                       | NM_013723                |
| Pou5f1                                            | POU domain, class 5, transcription factor 1                                            | NM_013633                |
| Pten                                              | Phosphatase and tensin homolog                                                         | NM_008960                |
| Ptf1a                                             | Pancreas specific transcription factor, 1a                                             | NM_018809                |
| Rest                                              | RE1-silencing transcription factor                                                     | NM_011263                |
| Runx2                                             | Runt related transcription factor 2                                                    | NM_009820                |
| Sema3a                                            | Sema domain, immunoglobulin domain (Ig), short basic domain, secreted, (semaphorin) 3A | NM_009152                |
| Serpina1a                                         | Serine (or cysteine) peptidase inhibitor, clade A, member 1a                           | NM_009243                |
| Sfrp2                                             | Secreted frizzled-related protein 2                                                    | NM_009144                |
| Sox17                                             | SRY-box containing gene 17                                                             | NM_011441                |
| Sox2                                              | SRY-box containing gene 2                                                              | NM_011443                |
| Sst                                               | Somatostatin                                                                           | NM_009215                |
| Sycp3                                             | Synaptonemal complex protein 3                                                         | NM_011517                |
| T                                                 | Brachyury                                                                              | NM_009309                |
| Tat                                               | Tyrosine aminotransferase                                                              | NM_146214                |
| Tcfcp2l1                                          | Transcription factor CP2-like 1                                                        | NM_023755                |
| TdGF1                                             | Teratocarcinoma-derived growth factor 1                                                | NM_011562                |
| Tert                                              | Telomerase reverse transcriptase                                                       | NM_009354                |
| Ulf1                                              | Undifferentiated embryonic cell transcription factor 1                                 | NM_009482                |
| Wt1                                               | Wilms tumor 1 homolog                                                                  | NM_144783                |
| Zfp42                                             | Zinc finger protein 42                                                                 | NM_009556                |
| <b>HOUSEKEEPING GENES &amp; INTERNAL CONTROLS</b> |                                                                                        |                          |
| Gusb                                              | Glucuronidase, beta                                                                    | NM_010368                |
| Hprt1                                             | Hypoxanthine guanine phosphoribosyl transferase 1                                      | NM_013556                |
| Hsp90ab1                                          | Heat shock protein 90 alpha (cytosolic), class B member 1                              | NM_008302                |
| Gapdh                                             | Glyceraldehyde-3-phosphate dehydrogenase                                               | NM_008084                |
| Actb                                              | Actin, beta                                                                            | NM_007393                |
| MGDC                                              | Mouse Genomic DNA Contamination                                                        | SA_00106                 |
| RTC                                               | Reverse Transcription Control                                                          | SA_00104                 |
| RTC                                               | Reverse Transcription Control                                                          | SA_00104                 |
| RTC                                               | Reverse Transcription Control                                                          | SA_00104                 |
| PPC                                               | Positive PCR Control                                                                   | SA_00103                 |
| PPC                                               | Positive PCR Control                                                                   | SA_00103                 |
| PPC                                               | Positive PCR Control                                                                   | SA_00103                 |
